# Supplementary material for: Genotype by Environment Interaction Effects on Nutraceutical Lipid Compounds of Pigmented Rice (Oryza sativa L. ssp. indica)
Source: Hindawi journal article supplement (doi:10.1155/2021/8880487), 2021-02-22
Supplement: f1 [file 8880487.f1.docx]

Temperature (°C)

Relative humidity (%)

Rainfall (mm day-1)

Solar radiation (MJ.m-2.day-1)

(**a**)

Temperature (°C)

Relative humidity (%)

Rainfall (mm day-1)

Solar radiation (MJ.m-2.day-1)

(**b**)

Temperature (°C)

Relative humidity (%)

Rainfall (mm day-1)

Solar radiation (MJ.m-2.day-1)

(**c**)

Temperature (°C)

Relative humidity (%)

Rainfall (mm day-1)

Solar radiation (MJ.m-2.day-1)

(**d**)

Temperature (°C)

Relative humidity (%)

Rainfall (mm day-1)

Solar radiation (MJ.m-2.day-1)

(**e**)

Temperature (°C)

Relative humidity (%)

Rainfall (mm day-1)

Solar radiation (MJ.m-2.day-1)

(**f**)

Temperature (°C)

Relative humidity (%)

Rainfall (mm day-1)

Solar radiation (MJ.m-2.day-1)

(**g**)

Temperature (°C)

Relative humidity (%)

Rainfall (mm day-1)

Solar radiation (MJ.m-2.day-1)

(**h**)

Day after anthesis (DAA)

FIGURE 1S: Total rainfall, relative humidity, temperature, and solar radiation during the grain filling stage at eight environments: Pathum Thani location in the growing season 2017 (a), Sakon Nakhon location in the growing season 2017 (b), Ubon Ratchathani location in the growing season 2017 (c), Roi-Et location in the growing season 2017 (d), Pathum Thani location in the growing season 2018 (e), Sakon Nakhon location in the growing season 2018 (f), Ubon Ratchathani location in the growing season 2018 (g), and Roi-Et location in the growing season 2018 (h).
